# Supplementary material
Source: PubMed Central journal article supplement (PMC7132336)
Supplement: EMBR-21-e48467-s001.pdf [file EMBR-21-e48467-s001.pdf]

## Appendix Figures/Tables

### The Appendix figure/table legends:

**Appendix Figure S1.** Knocking down circ0084171 alone could also slow down invasion in AR negative J82 cells. *Page 2.*

**Appendix Figure S2.** Representative FISH images using scramble control probe in bladder cancer UMUC3 cells. *Page 3.*

**Appendix Figure S3.** Western blot result demonstrated 2 specific shRNAs to ADAR2 repress ADAR2 at the protein level. *Page 4.*

**Appendix Figure S4.** Original ChIP assay image. ChIP pull-down DNA products were amplified by qRT-PCR reaction. The IgG antibody was used as a negative control. The Left side is: ARE I/II (Input, IgG, AR) and the Right side is: ARE III (Input, IgG, AR). *Page 5.*

**Appendix Figure S5.** RNA pull-down assay results revealed the biotinylated oligo successfully pulled down circFNTA and not linear FNTA. *Page 6.*

**Appendix Figure S6.** Transwell invasion assay showed oecirc\_0023642 could not rescue shAR induced invasion deduction in UMUC3 cells. *Page 7.*

**Appendix Figure S7.** The representative melting curve of circFNTA qRT-PCR assay in BCa J82 cell. *Page 8.*

**Appendix Figure S8.** MTT assays showed shcirc\_0084171 could partly reverse oeAR increased cisplatin chemo-resistance (2 g/ml) in J82 cells. *Page 9.*

**Appendix Figure S9.** MTT assays showed oecirc\_0084171 could partly overcome shAR effect for cisplatin chemo-resistance (2 g/ml) in UMUC3 cells. *Page 10.*

**Appendix Figure S10.** The qRT-PCR assays also validated circFNTA was significantly elevated in fresh BCa tissues vs. para-tumor tissues (N=19 patients, excluded 4 outliers and re-analyzed the data). *Page 11.*

**Appendix Table S1.** Oligos for plasmid construction. *Page 12-13.*

**Appendix Table S2.** qPCR primers. *Page 14-17.*

**Appendix Figure S1.** Knocking down circ0084171 alone could also slow down invasion in AR negative J82 cells. Scale bar, 100 $\mu$ m. Data information: Data shown represent the means  $\pm$  SD ( $n = 3$  biological replicates). Student's  $t$ -test was used for the statistical analysis ( $*P < 0.05$ ).

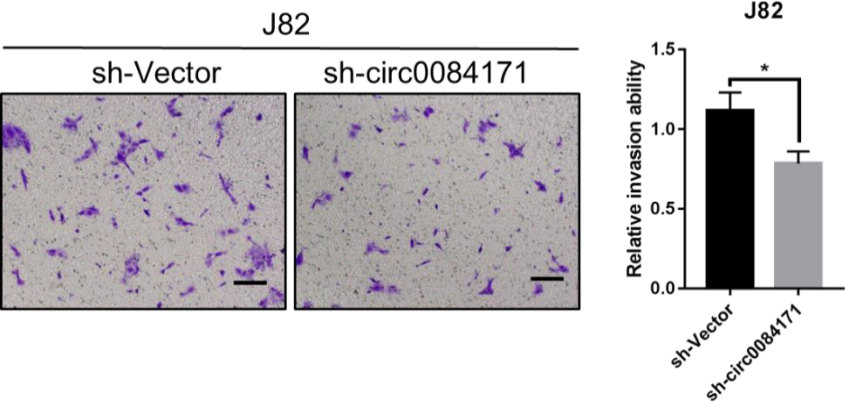

**Appendix Figure S2.** Representative FISH images using scramble control probe in bladder cancer UMUC3 cells. Scale bar, 20μm.

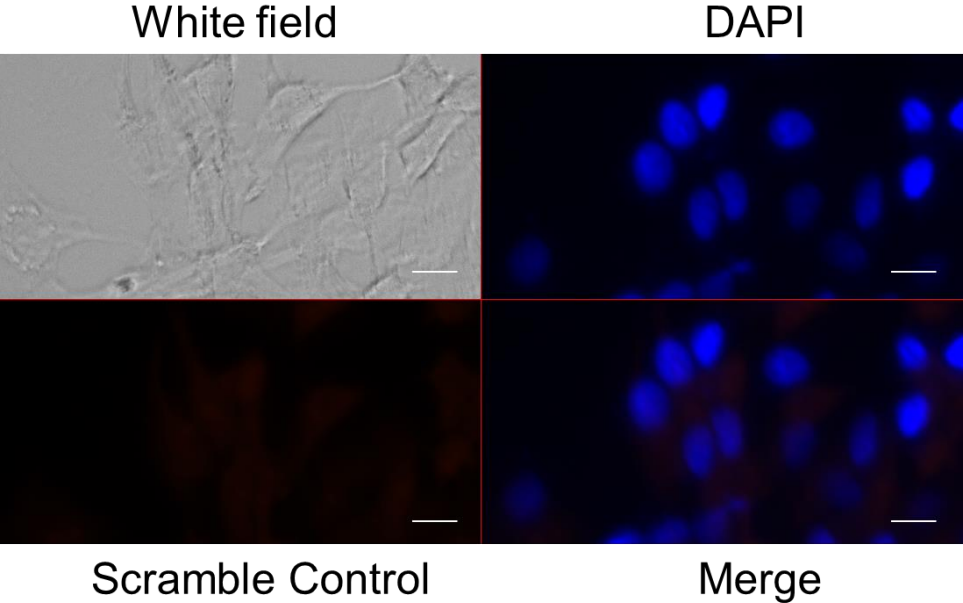

**Appendix Figure S3.** Western blot result demonstrated 2 specific shRNAs to ADAR2 repress ADAR2 at the protein level.

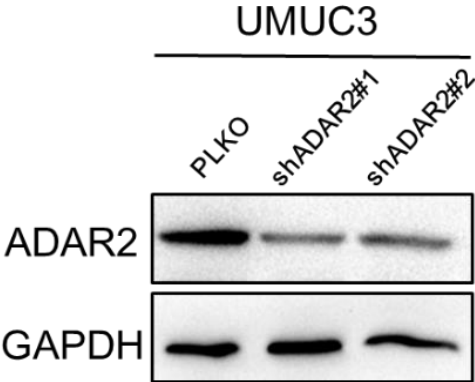

**Appendix Figure S4.** Original ChIP assay image. ChIP pull-down DNA products were amplified by qRT-PCR reaction. The IgG antibody was used as a negative control. The Left side is: ARE I/II (Input, IgG, AR) and the Right side is: ARE III (Input, IgG, AR).

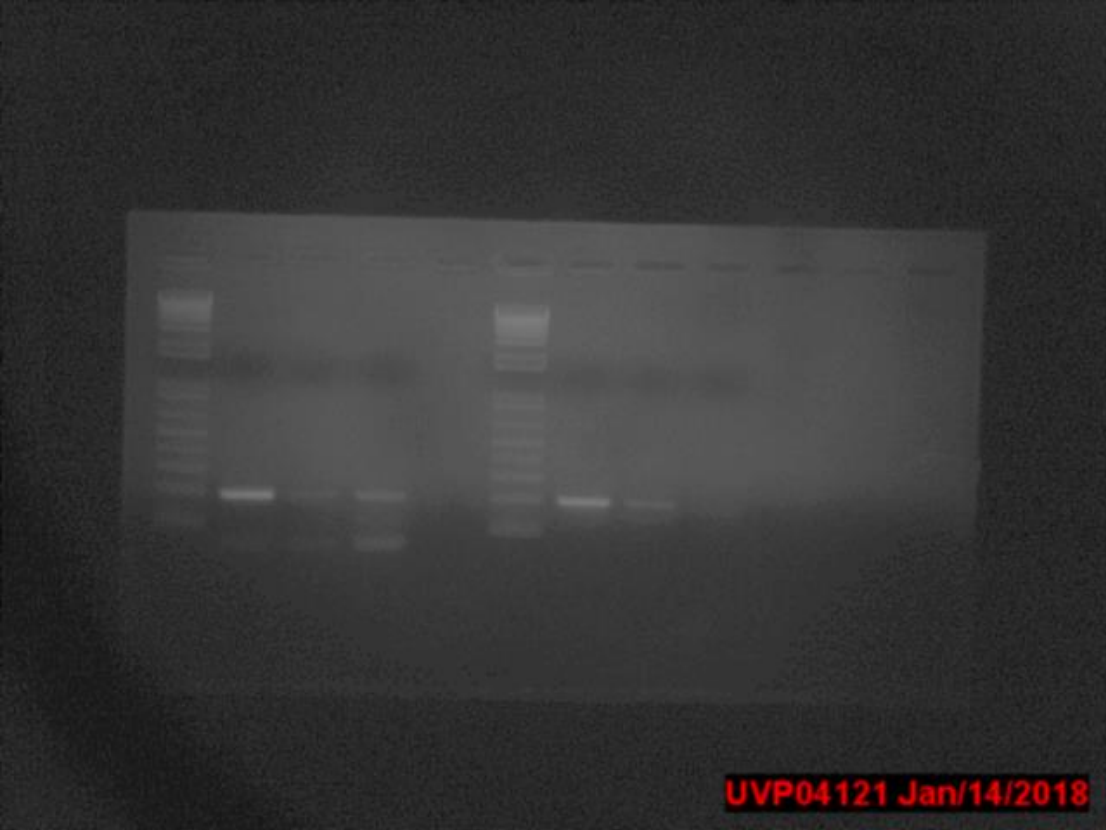

**Appendix Figure S5.** RNA pull-down assay results revealed the biotinylated oligo successfully pulled down circFNTA and not linear FNTA. Data information: Data shown represent the means  $\pm$  SD ( $n = 3$  biological replicates). Student's  $t$ -test was used for the statistical analysis (\*\* $P < 0.01$ , NS=Not significant).

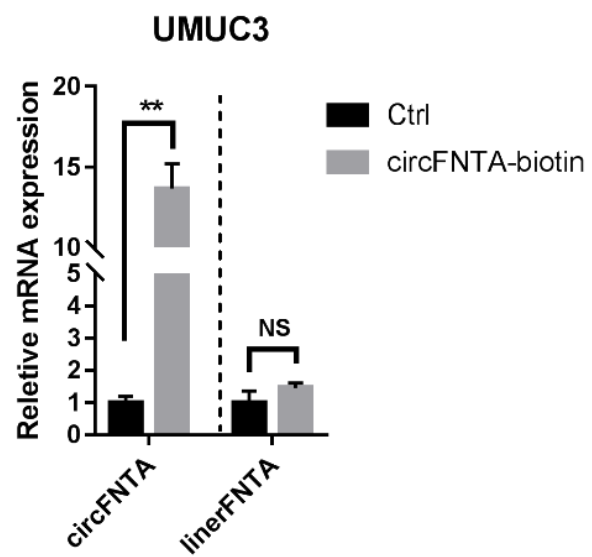

**Appendix Figure S6.** Transwell invasion assay showed oecirc\_0023642 could not rescue shAR induced invasion deduction in UMUC3 cells. Scale bar, 100 $\mu$ m.

Data information: Data shown represent the means  $\pm$  SD ( $n = 3$  biological replicates). Student's  $t$ -test was used for the statistical analysis (\*\* $P < 0.01$ , NS=Not significant).

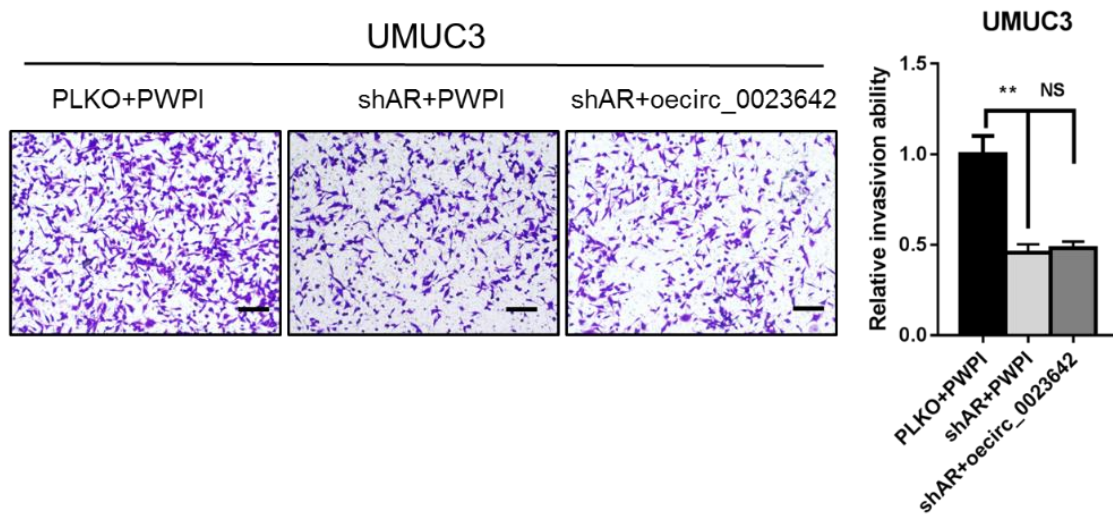

Appendix Figure S7. The representative melting curve of circFNTA qRT-PCR assay in BCa J82 cell.

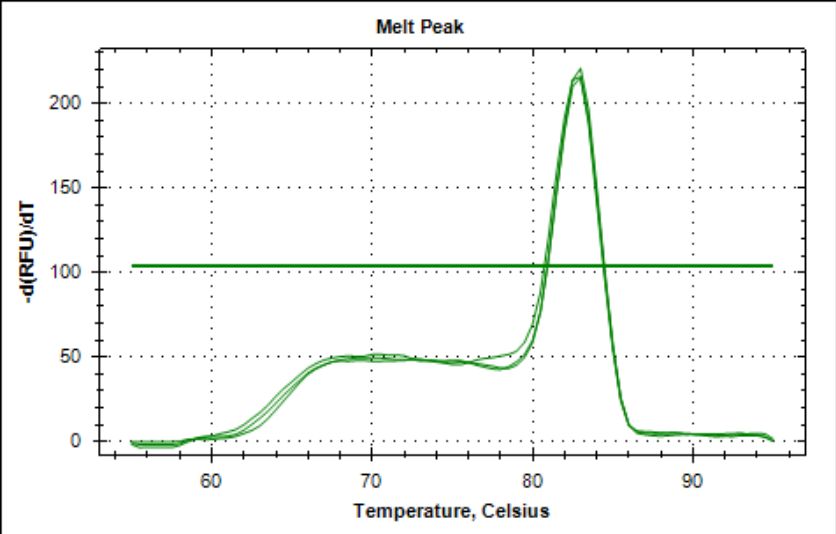



**Appendix Figure S8.** MTT assays showed shcirc\_0084171 could partly reverse oeAR increased cisplatin chemo-resistance (2 g/ml) in J82 cells. Data information: Data shown represent the means  $\pm$  SD ( $n = 3$  biological replicates). Student's  $t$ -test was used for the statistical analysis (\*\*\*)  $P < 0.001$

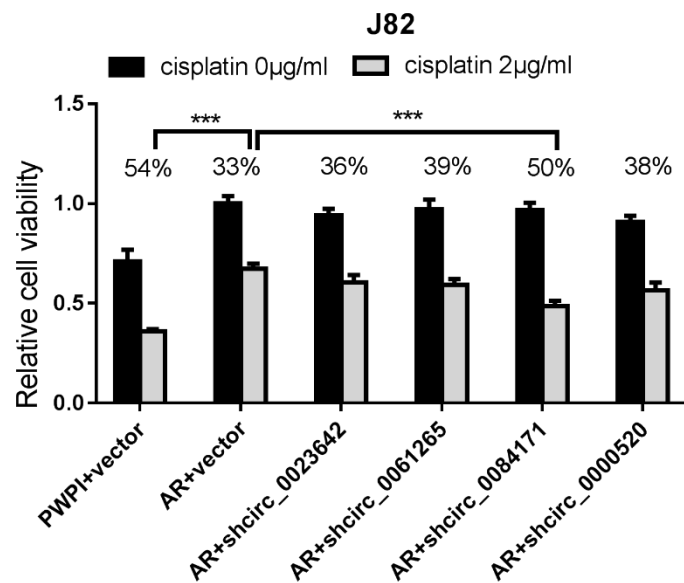

**Appendix Figure S9.** MTT assays showed oecirc\_0084171 could partly overcome shAR effect for cisplatin chemo-resistance (2 g/ml) in UMUC3 cells. Data information: Data shown represent the means  $\pm$  SD ( $n = 3$  biological replicates). Student's  $t$ -test was used for the statistical analysis (\*\* $P < 0.01$ , \*\*\* $P < 0.001$ )

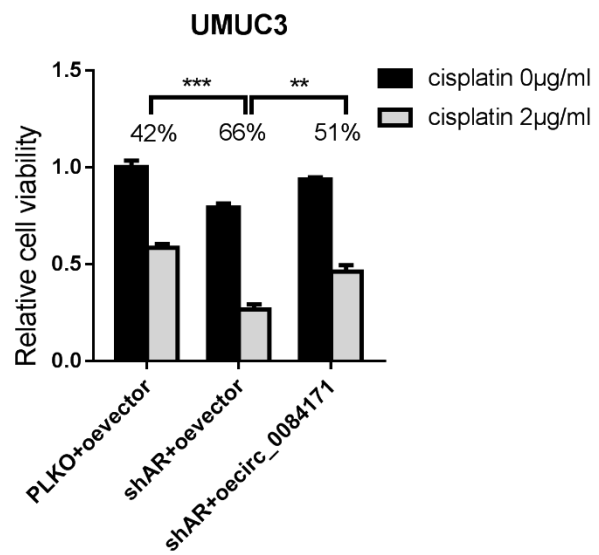

**Appendix Figure S10.** The qRT-PCR assays also validated circFNTA was significantly elevated in fresh BCa tissues vs. para-tumor tissues (N=19 patients, excluded 4 outliers and re-analyzed the data). Data information: Data shown represent the means  $\pm$  SD ( $n = 3$  biological replicates). Student's  $t$ -test was used for the statistical analysis (\*\* $P < 0.01$ ).

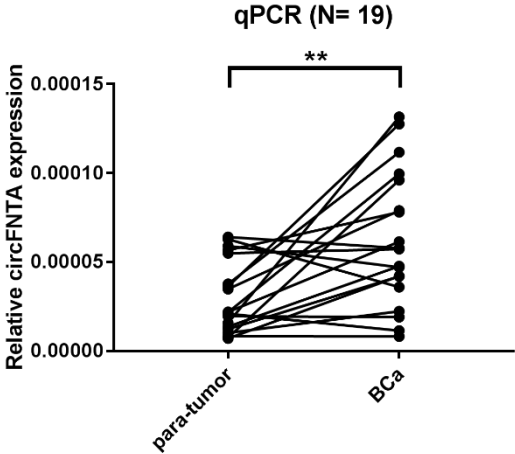

**Appendix Table S1. Oligos for plasmid construction.**

| Plasmid names                                                    |   | Sequences                                                                          |
|------------------------------------------------------------------|---|------------------------------------------------------------------------------------|
| PLKO-shAR                                                        | F | 5'CCGGCAATGAACTGGGAGAGAGACTCGAGTGTCTCTCTCCCAGTTCATTGTTTTTG 3'                      |
|                                                                  | R | 5'AATTCAAAAACAATGAACTGGGAGAGAGACTCGAGTGTCTCTCTCCCAGTTCATTG 3'                      |
| PLKO-shcirc_0023642                                              | F | 5'CCGGGAGAGACAAAAGATGATGGAAGGATCCTTCCATCATCTTTTGTCTCTCTTTTTG 3'                    |
|                                                                  | R | 5'AATTCAAAAAGAGAGACAAAAGATGATGGAAGGATCCTTCCATCATCTTTTGTCTCTC 3'                    |
| PLKO-shcirc_0061265                                              | F | 5'CCGGGCGGAGAGAGGAGAAATCCCAGGATCCTGGGATTTCTCCTCTCTCCGCTTTTTG 3'                    |
|                                                                  | R | 5'AATTCAAAAAGCGGAGAGAGGAGAAATCCCAGGATCCTGGGATTTCTCCTCTCTCCGC 3'                    |
| PLKO-shcirc_0000520                                              | F | 5'CCGGTTCGGGGAGGGAAGCTCATCAGGATCCTGATGAGCTTCCCTCCCCGAATTTTTG 3'                    |
|                                                                  | R | 5'AATTCAAAAATTCGGGGAGGGAAGCTCATCAGGATCCTGATGAGCTTCCCTCCCCGAA 3'                    |
| PLKO-shcirc_0084171 <sup>#1</sup><br>(shcircFNTA <sup>#1</sup> ) | F | 5'CCGGAAGTCCAGGACAGAGCAGAATGGATCCATTCTGCTCTGTCCTGGACTTTTTTTG 3'                    |
|                                                                  | R | 5'AATTCAAAAAAAGTCCAGGACAGAGCAGAATGGATCCATTCTGCTCTGTCCTGGACTT 3'                    |
| PLKO-shcirc_0084171 <sup>#2</sup><br>(shcircFNTA <sup>#2</sup> ) | F | 5'CCGGAAGTCCAGGACAGAGCAGAATACCCGGATCCGTATTCTGCTCTGTCCTGGACTTTTTTTG3'               |
|                                                                  | R | 5'AATTCAAAAAAAGTCCAGGACAGAGCAGAA TACGGATCCGGGTATTCTGCTCTGTCCTGGACTT 3'             |
| PLKO-shADAR2 <sup>#1</sup>                                       | F | 5'CCG GCC CGT GAT GAT CTT GAA CGA AGG ATC CTT CGT TCA AGA TCA TCA CGG GTT TTT G 3' |
|                                                                  | R | 5'AAT TCA AAA ACC CGT GAT GAT CTT GAA CGA AGG ATC CTT CGT TCA AGA TCA TCA CGG G 3' |
| PLKO-shADAR2 <sup>#2</sup>                                       | F | 5'CCG GCG GAG ATC CTT GCT CAG ATT TGG ATC CAA ATC TGA GCA AGG ATC TCC GTT TTT G 3' |
|                                                                  | R | 5'AAT TCA AAA ACG GAG ATC CTT GCT CAG ATT TGG ATC CAA ATC TGA GCA AGG ATC TCC G 3' |

|                         |   |                                                                                                    |
|-------------------------|---|----------------------------------------------------------------------------------------------------|
| ADAR2 PGL3 gibson (WT)  | F | 5'CTA TCG ATA GGT ACC GAG CTA AGG CGT CCC AGG AGT CTT G 3'                                         |
|                         | R | 5'CCA AGC TTA CTT AGA TCG CAT TCC CGC CGT CTC CTG TTT AG 3'                                        |
| ADAR2 PGL3 gibson (Mut) | F | 5'ATC CCA CCC CAT CCC TGG CT 3'                                                                    |
|                         | R | 5'CCT CAG CCA GTC TGG AGG CTG G 3'                                                                 |
| PLKO-shFNTA             | F | 5'CCGGACCAAAGATACTTCGTTATTTGGATCCAAATAACGAAGTATCTTTGGTTTTTTG 3'                                    |
|                         | R | 5'AATTCAAAAAACCAAAGATACTTCGTTATTTGGATCCAAATAACGAAGTATCTTTGGT 3'                                    |
| oemiR328-5p             | F | 5'ATA GAA GAT TCT AGA GCT AGC GGC ATT CAC CTT GGT TCG GAA 3'                                       |
|                         | R | 5'GCG GAT CCG ATT TAA ATT CGT GGC CCT GGA CAA CAT GTT 3'                                           |
| oemiR370-3p             | F | 5'CGC GTA CCA GGT TCC ACC CCA GCA GGC ACC CGG TCG ACG TGC CTG CTG GGG TGG AAC CTG GTT<br>TTT TG 3' |
|                         | R | 5'CGC AAA AAA CCA GGT TCC ACC CCA GCA GGC ACG TCG ACC GGG TGC CTG CTG GGG TGG AAC CTG<br>GTA 3'    |
| oemiR920                | F | 5'ATA GAA GAT TCT AGA GCT AGC GTG CAG GAC TCT TAC CAT TTA GC 3'                                    |
|                         | R | 5'GCG GAT CCG ATT TAA ATT CGA GTC AAA GAG TCT CCT GGG A 3'                                         |

---

**Appendix Table S2. qPCR primers.**

| Genes            | F or R | Sequences                      |
|------------------|--------|--------------------------------|
| hsa_circ_0000144 | F      | GAG CAA ATT TGG AGC AAA GG     |
|                  | R      | GGG CCT AAG CTA GTC CCT CA     |
| hsa_circ_0000658 | F      | GAC GAT CTC ATT GCT TGT GG     |
|                  | R      | CTT ACT CAG TGA TGC CCT TGC    |
| hsa_circ_0023642 | F      | AGG GGT CTA GAT CAA CAA TCA AA |
|                  | R      | CAT GGA GAC CAG ATG TGC AG     |
| hsa_circ_0002623 | F      | CGA GTC CCG CTT CTA CAG C      |
|                  | R      | CTC TCC AGT GGG AGG TTG AA     |
| hsa_circ_0032821 | F      | GGA GCA GCT TCT GGA TGA AA     |
|                  | R      | TCC TGT TCA GTC TCC AAG CA     |
| hsa_circ_0008035 | F      | GGA ATT GTG ACA AGC CCC TA     |
|                  | R      | CAA AGC CTC CAG GAA TCT GA     |
| hsa_circ_0005273 | F      | CGT CTA ATC CGA CAG CAA CA     |
|                  | R      | GTG GGC TGG GAT AAA ATC CT     |
| hsa_circ_0084171 | F      | TCT AAC ACC ACT GGC TAC AAT GA |
|                  | R      | ATG ATC TGG ACC ACG GGA TT     |
| hsa_circ_0058058 | F      | GGA CTA TGT GGT GGT GTC CA     |
|                  | R      | CGG TCA GGT TTC TTG CAA AT     |
| hsa_circ_0061265 | F      | TGC CAT CTA ACT CCG CTG AC     |

|                  |   |                            |
|------------------|---|----------------------------|
|                  | R | CCG GGT CCA CTA GAT GTC TG |
| hsa_circ_0001336 | F | CAA AAA TGC CAT GGA GGC TA |
|                  | R | CTG CCA AGT GCT GGC TGA T  |
| hsa_circ_0041103 | F | AGC AGA CAG ACC TCC CTG AG |
|                  | R | AAC GCA CAT TCC ATG CTG TA |
| hsa_circ_0047322 | F | TAA GGC AGC CAA GAG TCG TT |
|                  | R | TAA GGT TGA CCC CTG CCA TA |
| hsa_circ_0072088 | F | ATG GTC TGC AGT CCT GTG TG |
|                  | R | TGG TGG CAT GTT TTG TCA TT |
| hsa_circ_0008558 | F | GGC AGA AGG ACA GCA TAA GG |
|                  | R | GGG TTG TTC ACT CCC ACA GT |
| hsa_circ_0041151 | F | TGC AGG AAG AAA GTC TGC AC |
|                  | R | CCT AAT CTG CGG ATC TCC AA |
| hsa_circ_0011385 | F | CTG GCC ATG AGA GTG GAG AG |
|                  | R | CTT GTC CGT GGA GAA CAT GA |
| hsa_circ_0060219 | F | TGG AGG AGG AGA ACG AAG AG |
|                  | R | TGC AGC TGA TAC ACG TCC TC |
| hsa_circ_0000520 | F | GGG AAG GTC TGA GAC TAG GG |
|                  | R | GGA CAT GGG AGT GGA GTG AC |
| hsa_circ_0003528 | F | GTA ACC AGC AGC CTG GAC TC |
|                  | R | GCA ACT TGC TGA CCA GAA CA |

|                  |   |                             |
|------------------|---|-----------------------------|
| hsa_circ_0003266 | F | AGT TGA CAG CGG TAC CAT CC  |
|                  | R | GTA GGT TCG GCA AGT CCT CA  |
| hsa_circ_0092342 | F | AAG TGG GTT GGC AGT CTT TC  |
|                  | R | GCC AGA GTT TTG TAA GGG AAG |
| hsa_circ_0007158 | F | AGA TTT TGG GCT TCA CAT GC  |
|                  | R | CCA GCA TAT CCA CAG GGA AT  |
| hsa_circ_0028173 | F | GCG GGC AAT CTA CAA CAA C   |
|                  | R | ATC TTG GTT GAC AGC TCG TG  |
| hsa_circ_0009361 | F | GCC GAG CAA CTT AAG AAC CA  |
|                  | R | AGT GCT CTT CAA TGC CAC CT  |
| hsa_circ_0040039 | F | ACA TCG GGA TCT GTC ATC CT  |
|                  | R | TCC CAC GGC AGA TCT GAT AC  |
| hsa_circ_0092340 | F | ATAGGCATAACCCACCATGC        |
|                  | R | TGAACCCAGGAGGCTAAAGA        |
| hsa_circ_0082582 | F | TGGAAAGGCTTTTGGTTCAC        |
|                  | R | CAGCTTCAGCTGCTCCTTTT        |
| hsa_circ_0050867 | F | TTTCCTAGCCGGACTACGTG        |
|                  | R | CTCCTGGTCATTCCGGTTC         |
| hsa_circ_0079480 | F | GAAACCCAGAAGTTACTGAGCA      |
|                  | R | TTCACTTTTCAGCACTTCTTCAA     |
| linerFNTA        | F | CCT GCA GCG TGA TGA AAG AA  |



|               |   |                                 |
|---------------|---|---------------------------------|
|               | R | ACT CGC CTA TGA TGC CAA AC      |
| AR            | F | CCAGGGACCATGTTTTGCC             |
|               | R | CGAAGACGACAAGATGGACAA           |
| GAPDH         | F | TGTGGGCATCAATGGATTTGG           |
|               | R | ACACCATGTATTCCGGGTCAAT          |
| FNTA          | F | TGGACGACGGGTTTGTGAG             |
|               | R | ACCGGATCTATATCAGCCCATT          |
| ADAR          | F | CTG AGA CCA AAA GAA ACG CAG A   |
|               | R | GCC ATT GTA ATG AAC AGG TGG TT  |
| QKI           | F | AAG CCC ACC CCA GAT TAC CT      |
|               | R | ACT CTG CTA ATT TCT TCG TCC AG  |
| ADAR2         | F | GTG AAG GAA AAC CGC AAT CTG G   |
|               | R | CAG GAG TGT GTA CTG CAA ACC     |
| DHX9          | F | ACA CAG GTT CCC CAG TTC AT      |
|               | R | ATA CTG GCA TGA GGA CGA GG      |
| ADAR2 AREI/II | F | 5'AGT CGG AGT CTC AGT GTT GC 3' |
|               | R | 5'GGG AGT AAG AGA CCA TCG CA 3' |
| ADAR2 AREIII  | F | 5'TCC GGT CAG TGA AAA CGT TG 3' |
|               | R | 5'ACG TTT AGG TGA TGG TGG TT 3' |

---
